# Supplementary material
Source: PubMed Central journal article supplement (PMC8922419)

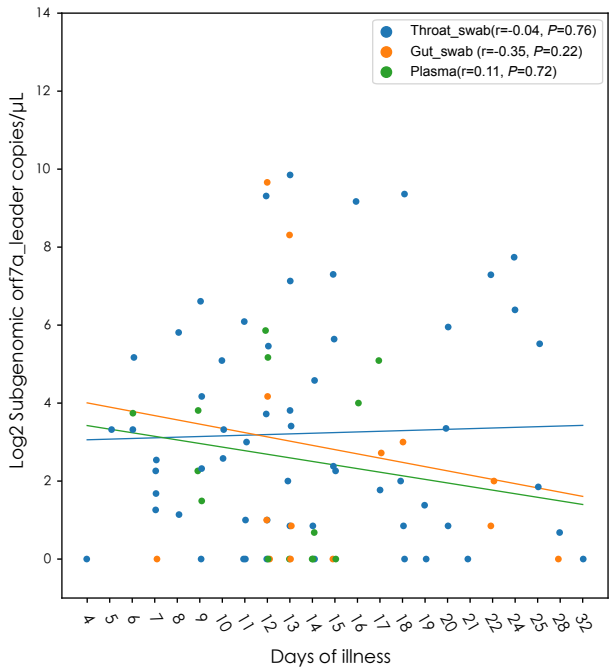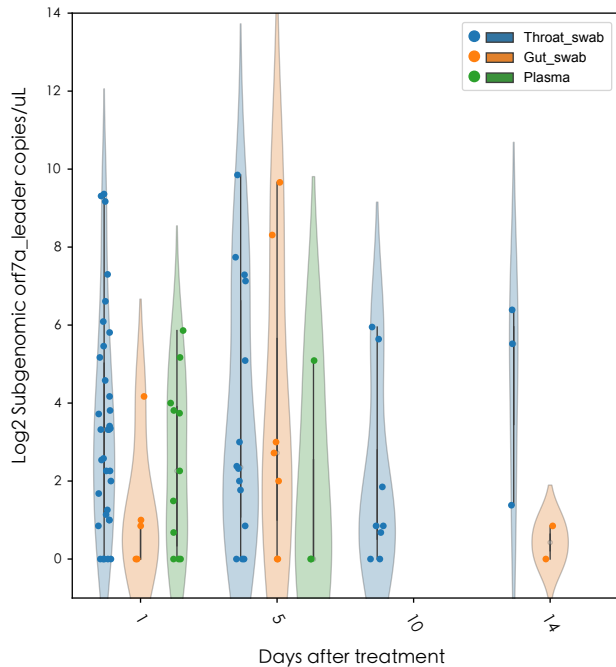

Supplement: mmc3.pdf [file mmc3.pdf]

Log2 Subgenomic E copies/ $\mu$ L

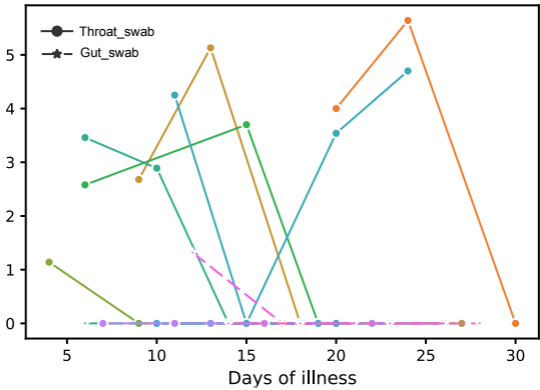

Supplement: mmc4.pdf [file mmc4.pdf]

Hypertension

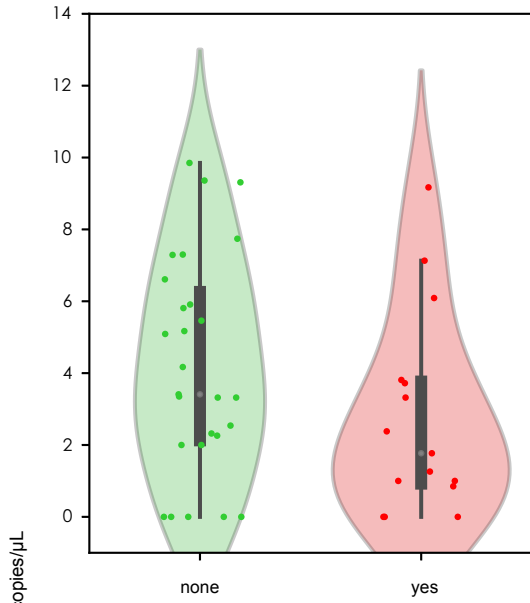

Diabetes

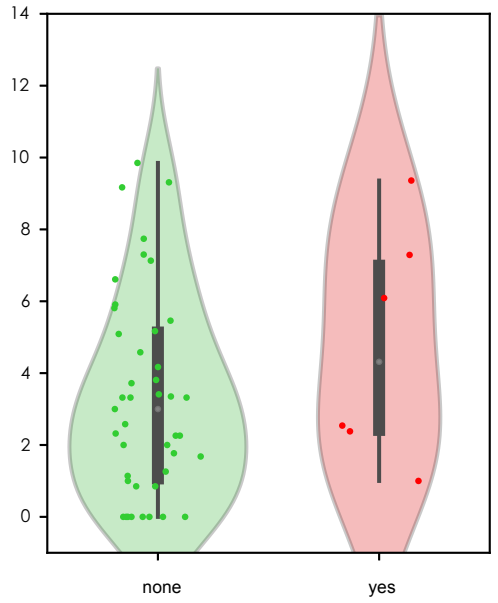

Heart disease

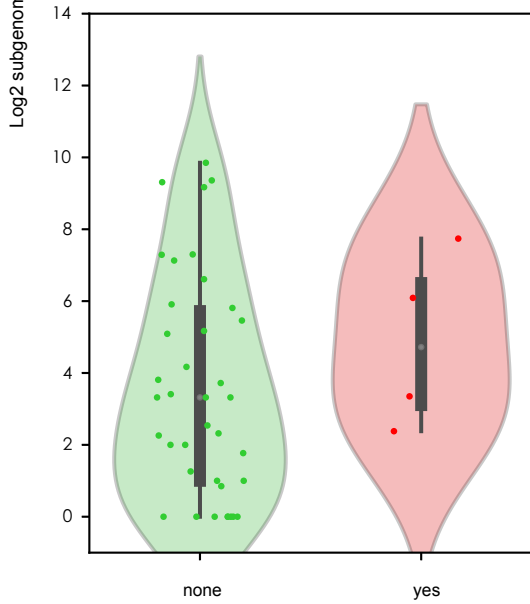

Cerebrovascular disease

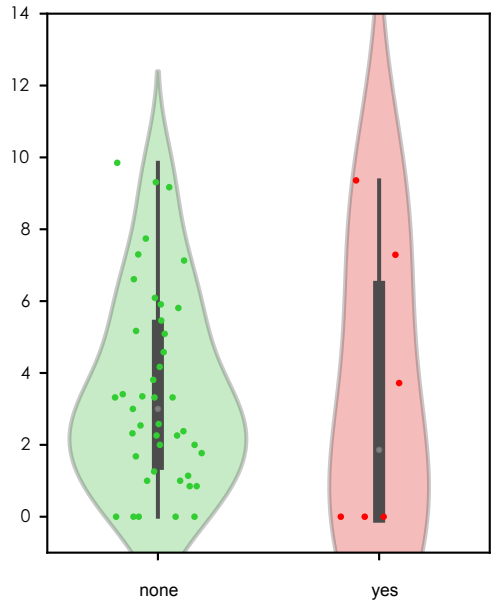

Supplement: mmc5.pdf [file mmc5.pdf]

IgM

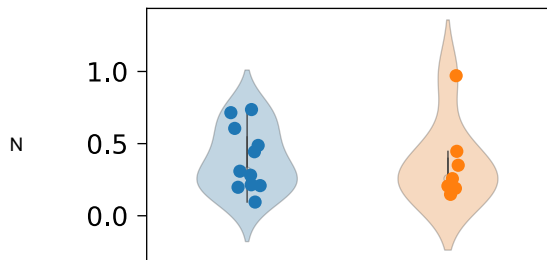

IgG

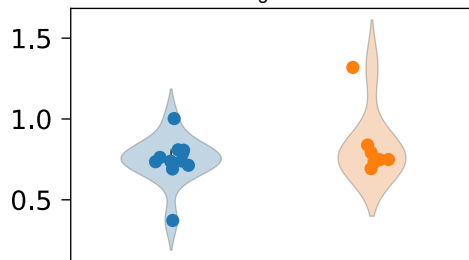

RBD

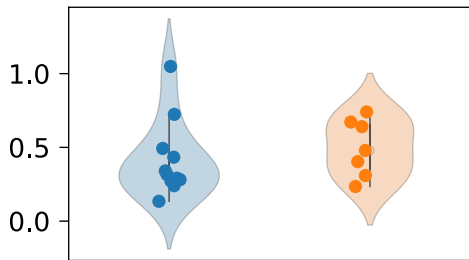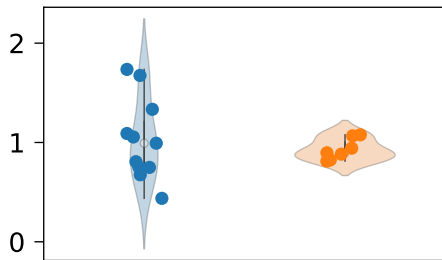

S

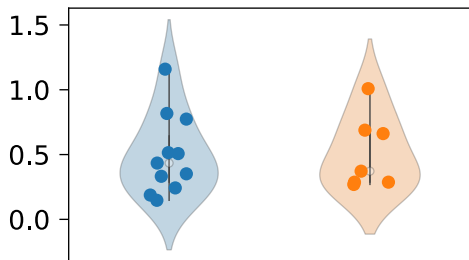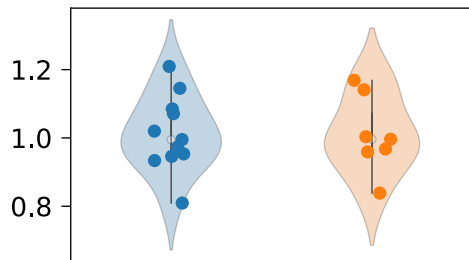

Negative

Positive

Negative

Positive

Supplement: mmc6.pdf [file mmc6.pdf]
